# Supplementary material for: Comparative Genomics of Apomictic Root-Knot Nematodes: Hybridization, Ploidy, and Dynamic Genome Change
Source: PubMed Central journal article supplement (PMC5737495; doi:10.1093/gbe/evx201), 2017-09-25
Supplement: evx201_supp.pdf [file evx201_supp.pdf]

# Comparative genomics of apomictic root-knot nematodes: hybridization, ploidy, and dynamic genome change

Amir Szitenberg<sup>1,2,§</sup>, Laura Salazar-Jaramillo<sup>3</sup>, Vivian C. Blok<sup>4</sup>, Dominik R. Laetsch<sup>3,4</sup>, Soumi Joseph<sup>5</sup>, Valerie M. Williamson<sup>6</sup>, Mark L. Blaxter<sup>3</sup>, David H. Lunt<sup>1</sup>

1 Evolutionary Biology Group, School of Environmental Sciences, University of Hull, Kingston upon Hull, UK

2 Microbial Metagenomics Division, Dead Sea and Arava Science Center, Mt. Masada, Israel

3 Institute of Evolutionary Biology, School of Biological Sciences, University of Edinburgh, Edinburgh, UK

4 The James Hutton Institute, Invergowrie, Dundee, UK

5 Department of Entomology and Nematology, University of Florida, Gainesville, USA

6 Department of Plant Pathology, University of California, Davis, USA

§ Correspondence: Amir Szitenberg, [amir@adssc.org](mailto:amir@adssc.org)

## Supplementary Material

### 0 Species sample metadata

**Table S1. *Meloidogyne* isolates sequenced in this study.** One draft *M. floridensis* genome was published previously (Lunt et al. 2014a). Some isolates have been in culture for a long time and exact origins are not available.

|   | Species             | Isolate | Sourced            | Geographic origin   | Notes                                                                                        |
|---|---------------------|---------|--------------------|---------------------|----------------------------------------------------------------------------------------------|
| 1 | <i>M. incognita</i> | A14     | Vivian Blok        | Libya               | Adam 2006 (PhD)                                                                              |
| 2 | <i>M. incognita</i> | L27     | Vivian Blok        | USA                 | Race 1, Blok et al 1997                                                                      |
| 3 | <i>M. incognita</i> | VW6     | Valerie Williamson | California, USA     | Isolated from cotton; (Wang et al. 2010)                                                     |
| 4 | <i>M. incognita</i> | W1      | Valerie Williamson | California, USA     | Isolated from tomato with the nematode resistance gene Mi-1; (Gross and Williamson 2011)     |
| 5 | <i>M. incognita</i> | HarC    | Valerie Williamson | California, USA     | Isolated from the nematode resistant grape variety Harmony; (Ferris, Zheng, and Walker 2012) |
| 6 | <i>M. incognita</i> | 557R    | Valerie Williamson | North Carolina, USA | Isolated from tomato with the nematode resistance gene Mi-1; (Yaghoobi et al. 1995)          |
| 7 | <i>M. incognita</i> | L19     | Vivian Blok        | French West Indies  | Blok et al 1997                                                                              |
| 8 | <i>M. incognita</i> | L9      | Vivian Blok        | Ivory coast, Africa | Blok et al 1997                                                                              |
| 9 | <i>M. javanica</i>  | VW5     | Valerie Williamson | California, USA     | Selected from strain VW4 following reproduction on Mi-1                                      |

|    |                       |      |                       |                    |                                                                                                          |
|----|-----------------------|------|-----------------------|--------------------|----------------------------------------------------------------------------------------------------------|
|    |                       |      |                       |                    | tomato;<br>(Gleason, Liu, and<br>Williamson 2008)                                                        |
| 10 | <i>M. javanica</i>    | VW4  | Valerie<br>Williamson | California, USA    | Also PacBio genome;<br>(Yaghoobi et al. 1995)                                                            |
| 11 | <i>M. javanica</i>    | L57  | Vivian Blok           | Morocco            | (Adam, Phillips, and<br>Blok 2005)                                                                       |
| 12 | <i>M. javanica</i>    | VB15 | Vivian Blok           | Unknown            |                                                                                                          |
| 13 | <i>M. javanica</i>    | VB17 | Vivian Blok           | Unknown            |                                                                                                          |
| 14 | <i>M. arenaria</i>    | L28  | Vivian Blok           | French West Indies | Blok et al 1997                                                                                          |
| 15 | <i>M. arenaria</i>    | L32  | Vivian Blok           | French West Indies | Blok et al 1997                                                                                          |
| 16 | <i>M. arenaria</i>    | HarA | Valerie<br>Williamson | California, USA    | Isolated from the<br>nematode resistant<br>grape variety Harmony;<br>(Ferris, Zheng, and<br>Walker 2012) |
| 17 | <i>M. enterolobii</i> | L30  | Vivian Blok           | Burkino Faso       | Blok et al 1997                                                                                          |
| 18 | <i>M. floridensis</i> | SJF1 | Soumi Joseph          | Florida, USA       | Isolated from peach                                                                                      |
| 19 | <i>M. floridensis</i> | JB5  | Janete Brito          | Florida, USA       | (Lunt et al. 2014a)                                                                                      |
| 20 | <i>M. haplanaria</i>  | SJH1 | Soumi Joseph          | Florida, USA       | Isolated from tomato<br>with the nematode<br>resistance gene Mi-1;<br>(Joseph et al. 2016)               |

Table S2 - Genome assembly statistics

| Species             | Strain | Insert size | Reads       | Size (bp)      | Exp. coverage |
|---------------------|--------|-------------|-------------|----------------|---------------|
| <i>M. javanica</i>  | VW4    | 300         | 62,075,861  | 7,635,287,416  | 100x          |
| <i>M. javanica</i>  | VW4    | 500         | 123,728,247 | 15,168,259,765 | 200x          |
| <i>M. javanica</i>  | VW5    | 350         | 193,072,088 | 24,134,011,000 | 320x          |
| <i>M. javanica</i>  | L57    | 350         | 32,669,417  | 4,083,677,125  | 27x           |
| <i>M. javanica</i>  | L15    | 350         | 29,324,182  | 3,665,522,750  | 24x           |
| <i>M. javanica</i>  | L17    | 350         | 31,332,441  | 3,916,555,125  | 26x           |
| <i>M. incognita</i> | W1     | 350         | 38,260,145  | 4,782,518,125  | 63x           |
| <i>M. incognita</i> | W1     | 550         | 30,290,198  | 3,786,274,750  | 50x           |
| <i>M. incognita</i> | VW6    | 350         | 28,840,610  | 3,605,076,250  | 48x           |
| <i>M. incognita</i> | VW6    | 550         | 25,746,808  | 3,218,351,000  | 42x           |
| <i>M. incognita</i> | HarC   | 350         | 26,844,521  | 3,355,565,125  | 44x           |
| <i>M. incognita</i> | HarC   | 550         | 35,340,761  | 4,417,595,125  | 58x           |
| <i>M. incognita</i> | 557R   | 550         | 62,745,198  | 7,843,149,750  | 104x          |
| <i>M. incognita</i> | L9     | 350         | 19,009,603  | 2,376,200,375  | 18x           |
| <i>M. incognita</i> | L19    | 350         | 33,486,356  | 4,185,794,500  | 28x           |
| <i>M. incognita</i> | L27    | 350         | 35,218,809  | 4,402,351,125  | 29x           |
| <i>M. incognita</i> | A14    | 350         | 20,025,193  | 2,503,149,125  | 17x           |
| <i>M. arenaria</i>  | HarA   | 350         | 49,813,878  | 6,226,734,750  | 41x           |

|                       |      |     |             |                |      |
|-----------------------|------|-----|-------------|----------------|------|
| <i>M. arenaria</i>    | HarA | 550 | 46,643,017  | 9,656,831,750  | 64x  |
| <i>M. arenaria</i>    | L28  | 350 | 16,744,391  | 2,093,048,875  | 14x  |
| <i>M. arenaria</i>    | L32  | 350 | 14,159,397  | 176,9924,625   | 11x  |
| <i>M. enterolobii</i> | L30  | 350 | 143,672,079 | 17,959,009,875 | 120x |
| <i>M. enterolobii</i> | L30  | 550 | 100,032,455 | 12,504,056,875 | 83x  |
| <i>M. floridensis</i> | SJF1 | 350 | 105,579,171 | 13,197,396,375 | 175x |
| <i>M. floridensis</i> | SJF1 | 550 | 95,211,681  | 11,901,460,125 | 160x |

# 1 Randomization tests for the phylogenetic congruence between genome A and genome B

## 1.1 Coalescent gene tree based analysis

If the two homoeologues were acquired at the base of MIG as a result of a single hybridization event, then their phylogenetic trees should be congruent and reflect their coevolution. If this is correct, in the reconstruction of a coalescence tree based on 533 gene trees, we may randomly assign the homoeologue annotation to either of the subtree in each of the gene trees (Figure S3A). In each gene tree, homoeologs are denoted 1 and 2 instead of A and B because for most gene pairs we lack synteny information. In Figure S3B, the non-randomized coalescence tree supports the phylogenetic relationships recovered in the maximum likelihood tree (Figure 3). In the non-randomized tree, in each of the gene trees we denoted the slower evolving homoeologue as homoeologue 1. As this is an artificial decision, we can only be confident in the topology of our multi-loci trees, and not in the branch length, as long as there is phylogenetic congruence between the two homoeologues. Figure S3C is the strict consensus of all the randomised coalescence analyses, which also supports all the interspecies relationships within both homoeologue subtrees.

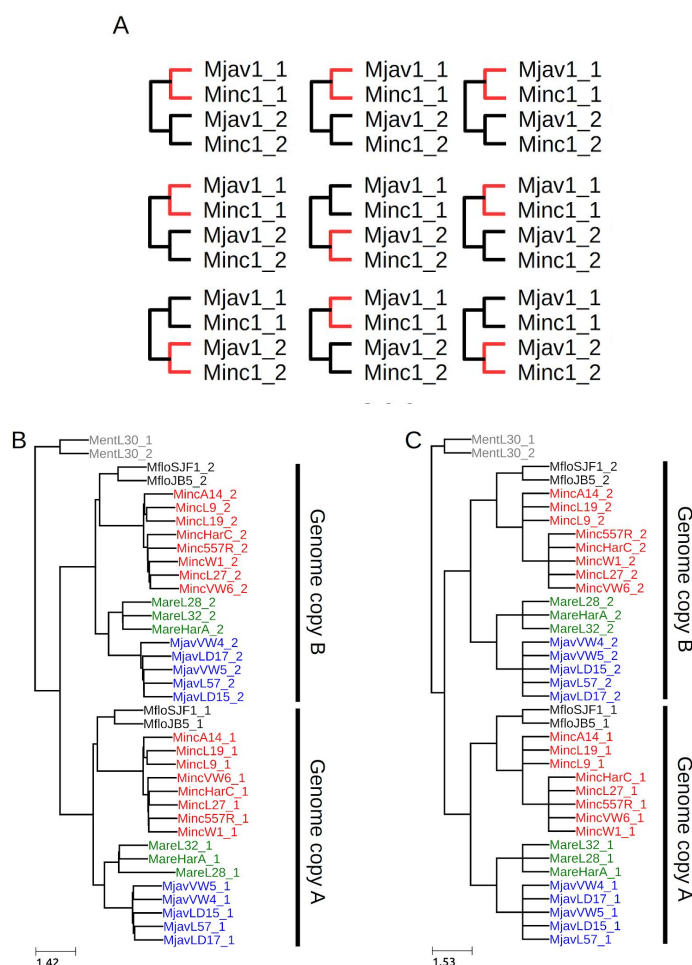

Figure S1: The randomized homoeologue coalescence approach used to confirm the phylogenetic congruence between homoeologue A and B (A), the non-randomised coalescence tree with all the gene trees “pre-ordered” (B), and the resulting strict consensus tree off all the randomized coalescence trees.

## 1.2 Supermatrix maximum likelihood based analysis

If the two homoeologues were acquired at the base of MIG as a result of a single hybridization event, then their phylogenetic trees should be congruent and reflect their coevolution. If this is correct, we may concatenate the homoeologue A sequence from gene x with homoeologue B sequences from gene y, and *vice versa*, without altering the phylogenetic relationships within each of the homoeologue subtrees, as they are the same (Figure S3A). We produced 100 supermatrices with the 533 nuclear genes used for Figure 3, and randomized the concatenation of the two homoeologues as described above and in Figure S4A. We produced a strict consensus of the resulting 100 trees (Figure S3B), showing that the relationship between species within each of the homoeologue subtrees were recovered in all the 100 trees. This confirms that the two homoeologues share the same phylogenetic history. (See next page for figure legend)

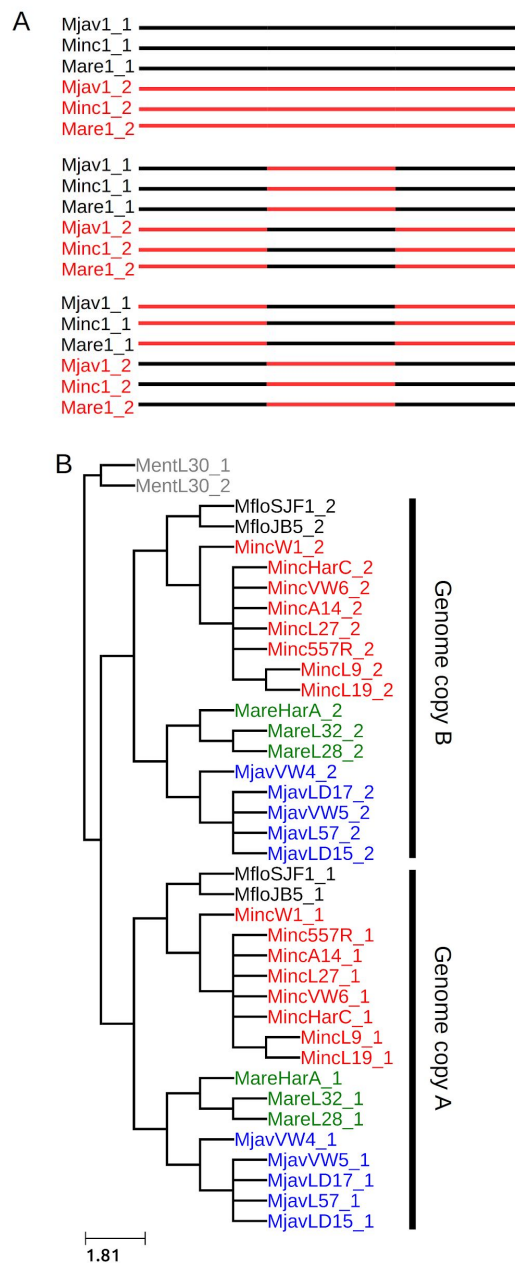

Figure S2: The randomized homoeologue concatenation approach used to confirm the phylogenetic congruence between homoeologue A and B (A), and the resulting strict

consensus tree off all the randomized matrices (B). The homoeologs are denoted 1 and 2 instead of A and B because for most gene pairs we lack synteny information.

## 2. Gene conversion

A

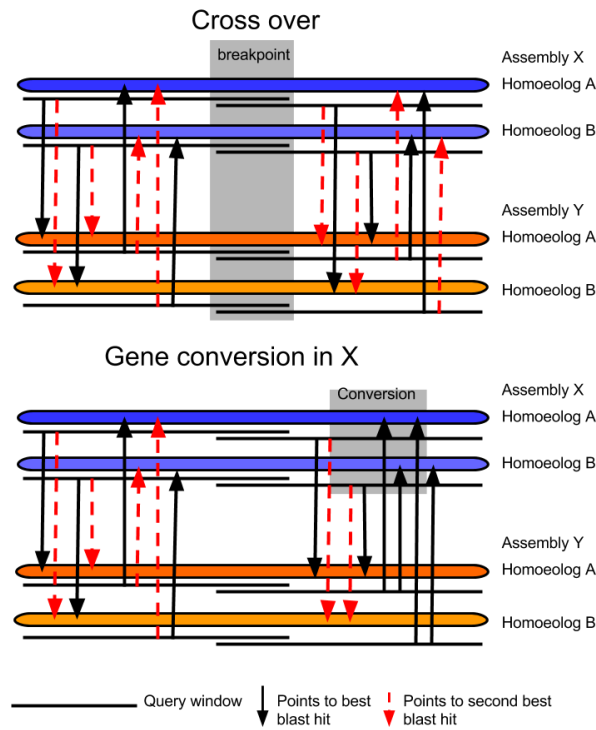

B

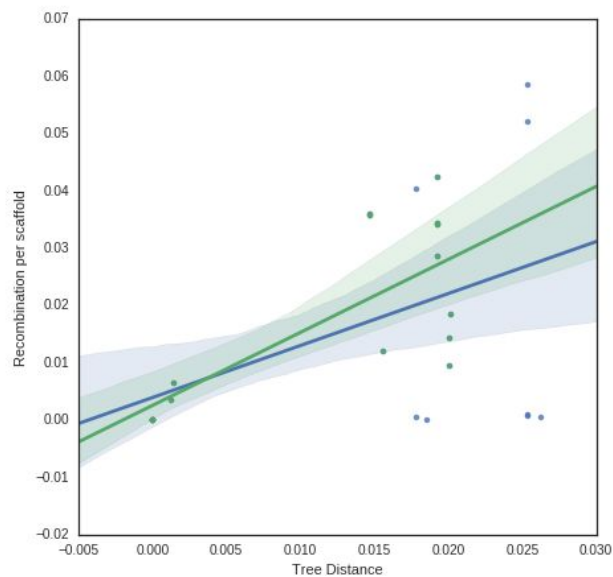

Figure S3: Detection of recombination events and distinction between gene conversion and recombination using BLAST (A). Correlation between MIG tree distances and gene conversion rates when including *M. floridensis* (blue, Pearson's  $r = 0.4$ ) or excluding it (green,  $r = 0.74$ ) (B).

Table S3: Recombination events per scaffold

|                 | <b>MareHarA</b> | <b>MfloSJF1</b> | <b>MincL27</b> | <b>MincW1</b> | <b>MjavVW4</b> | <b>MjavVW5</b> |
|-----------------|-----------------|-----------------|----------------|---------------|----------------|----------------|
| <b>MareHarA</b> | 0.000000        | 0.052212        | 0.009484       | 0.034404      | 0.035968       | 0.011982       |
| <b>MfloSJF1</b> | 0.003972        | 0.000000        | 0.000000       | 0.003128      | 0.002062       | 0.000000       |
| <b>MincW1</b>   | 0.028550        | 0.040255        | 0.003557       | 0.000000      | 0.034135       | 0.018472       |
| <b>MjavVW4</b>  | 0.035750        | 0.058589        | 0.014226       | 0.042366      | 0.000000       | 0.006490       |

Exchange event counts between homologues (as in Figure S3 a) normalized by the number of the long scaffolds included in the analysis. The matrix is asymmetric: Y-axis samples served as a target in the blast analysis (Figure S3 a) and X-axis samples as subject.



### 3. Nuclear phylogenomic ML tree including the *M. incognita* isolate from (Abad et al. 2008).

Despite the wide geographic range of our *M. incognita* samples and the low genetic diversity they present, the Morelos strain from (Abad et al. 2008) seems to be an outgroup to the other *M. incognita* (Figure S3). Without access to the raw data and with the reported differences in sequencing and bioinformatics approaches it is difficult to explain these differences.

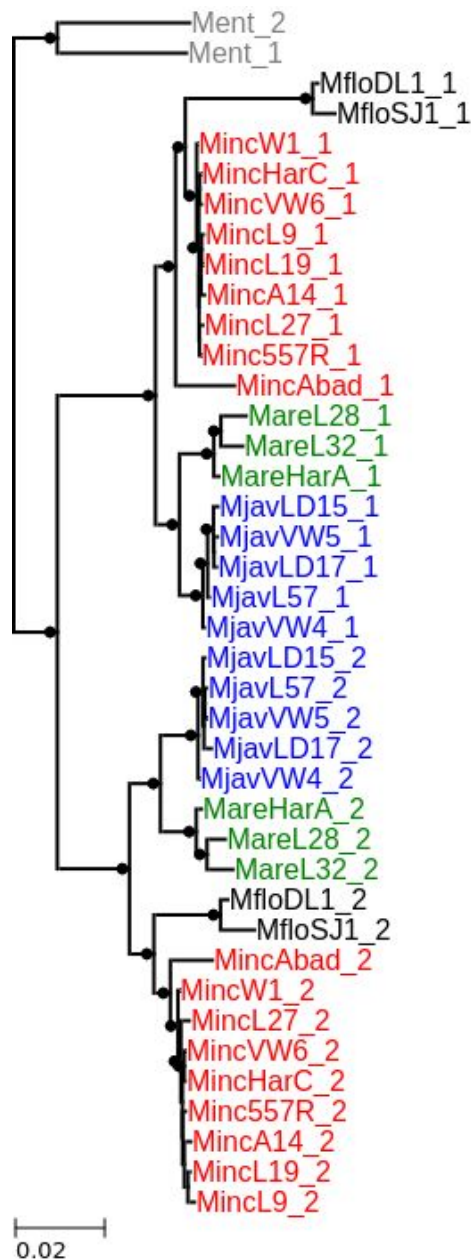

Figure S4: A maximum likelihood phylogenetic tree, of MIG and outgroup species. With the exception of the inclusion of the Morelos strain, it is identical to the tree in Figure 3.

## 4. Transposable elements

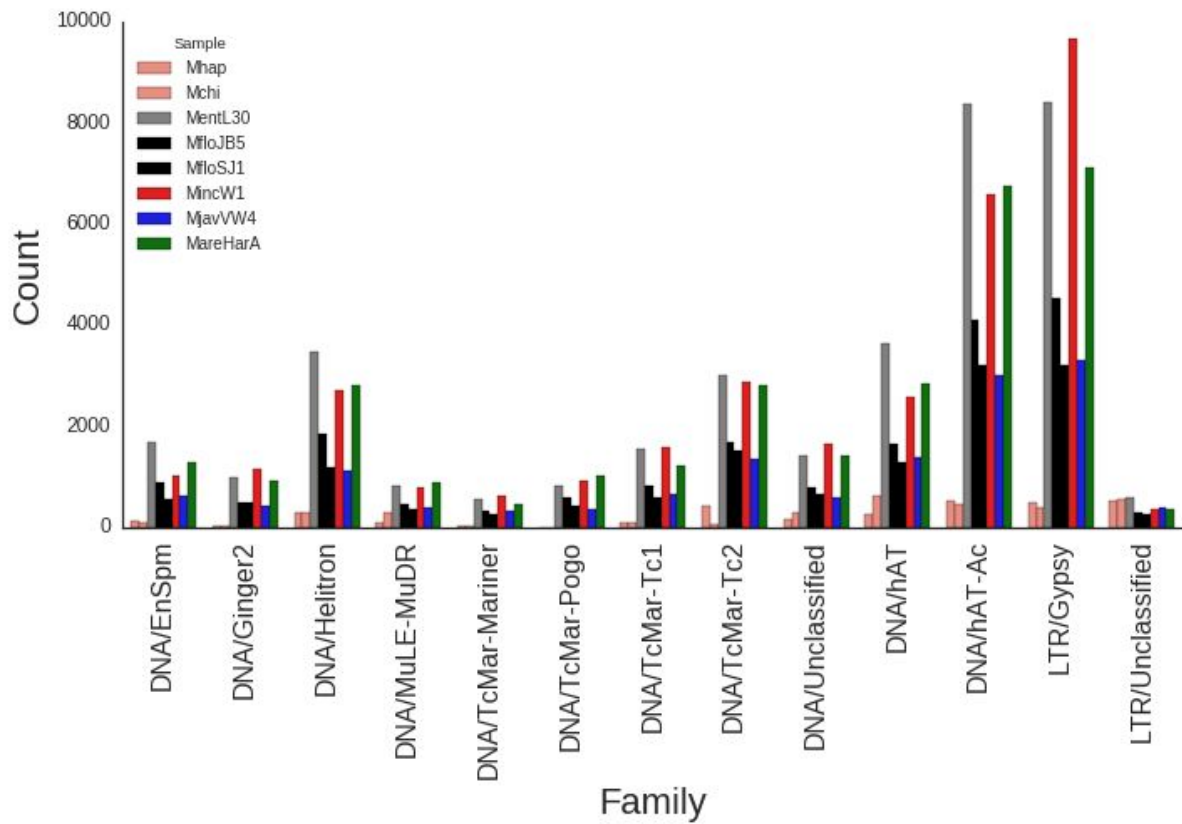

Figure S5: Counts of the 13 largest transposon families in the RKN genomes.

## 5. Revisit of previous orthology analyses

### 5.1 Gene trees of orthology clusters with three *Meloidogyne floridensis* copies

Supplementary data from (Lunt et al. 2014b) was downloaded from Figshare (<http://dx.doi.org/10.6084/m9.figshare.978784>). FastTree (Price, Dehal, and Arkin 2010) was used to reconstruct gene trees from the DNA sequence alignments of orthology clusters (OCs) with three copies for *M. floridensis*, as provided in the download. Among the 20 OCs, 4 supported the double hybrid hypothesis presented in (Lunt et al. 2014b), (e.g. Figure S6A), 7 appeared to represent two pooled OCs (e.g. Figure S6B), 7 contained *M. floridensis* inparalogues (e.g. Figure S6C), and two contained *M. floridensis* copies that had very little or no overlap.

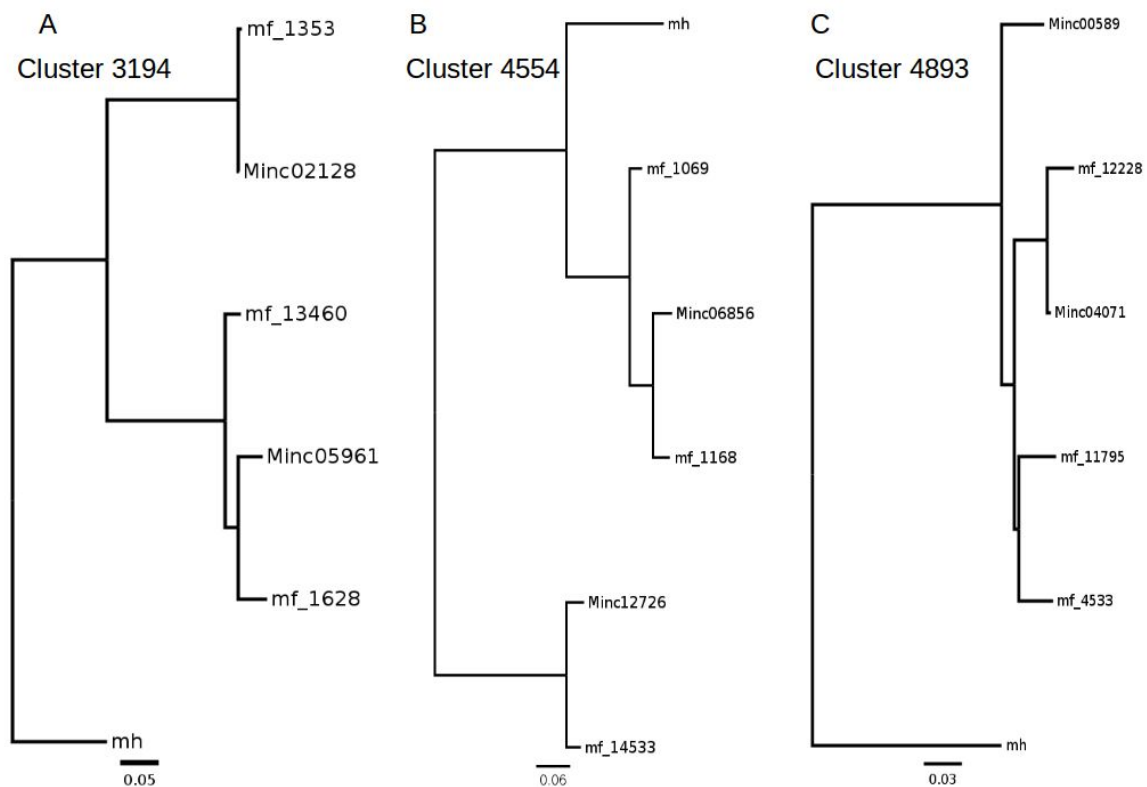

Figure S6: Phylogenetic patterns representing orthology clusters with three *M. floridensis* copies in the data of (Lunt et al. 2014b). Tree A represents clusters which support authentic three copies in *M. floridensis*, tree B represents clusters that appear to be a merge of two orthology groups, and tree C represents clusters with *M. floridensis* inparalogs. mf: *M. floridensis*, mh: *M. hapla*, Minc: *M. incognita*.

## 5.2 Gene trees of orthology clusters with three *Meloidogyne incognita* copies and two *M. floridensis* copies

Among 36 OCs with three *M. incognita* copies and two *M. floridensis* copies, 8 OCs support three genome copies in *M. incognita*, two of which are shared with *M. floridensis* (e.g. Figure S7A), 6 OCs recover other relationships (e.g. Figure S7B), 6 appear to be merged OCs (e.g. Figure S7C), 13 contain *M. incognita* inparalogs (e.g. Figure S7D), three OCs with “orthologs” that do not overlap.

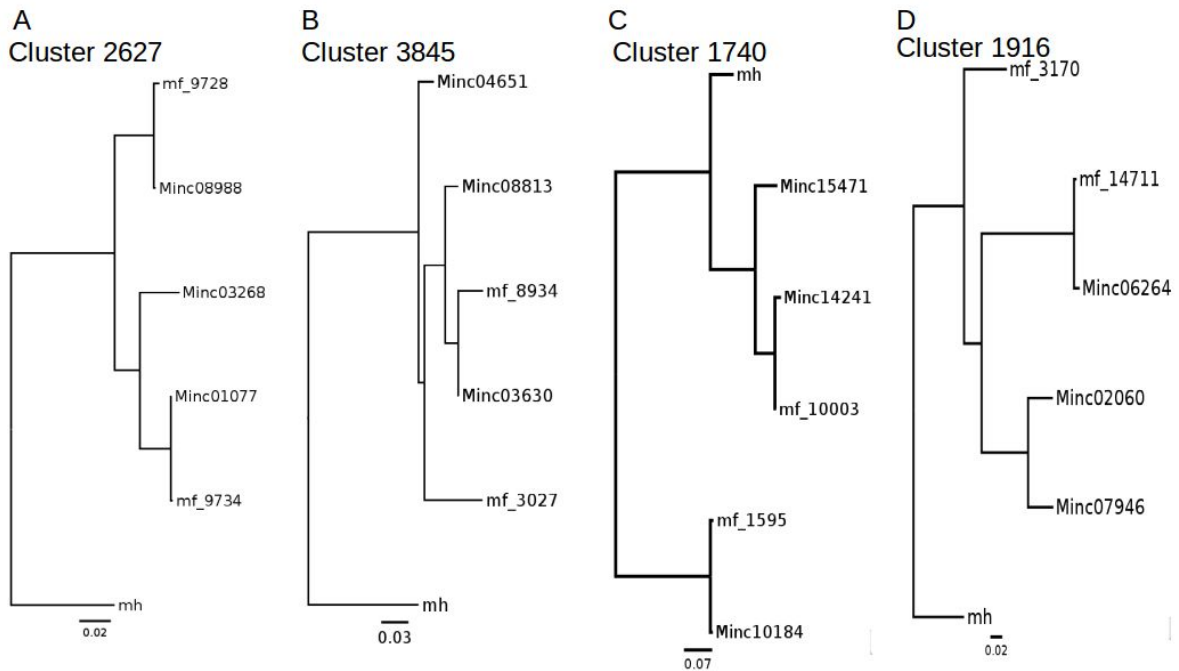

Figure S7: Phylogenetic patterns representing orthology clusters with three *M. incognita* copies in the data of (Lunt et al. 2014b). Tree A represents clusters which support authentic three copies in *M. incognita*, two of which are shared with *M. floridensis* tree B represents clusters with other relationships, tree C represents clusters that appear to be a merge of two orthology groups, and tree D represents clusters with *M. incognita* inparalogs. mf: *M. floridensis*, mh: *M. hapla*, Minc: *M. incognita*.

## 6. Phylogenetic analysis of mitochondrial genes

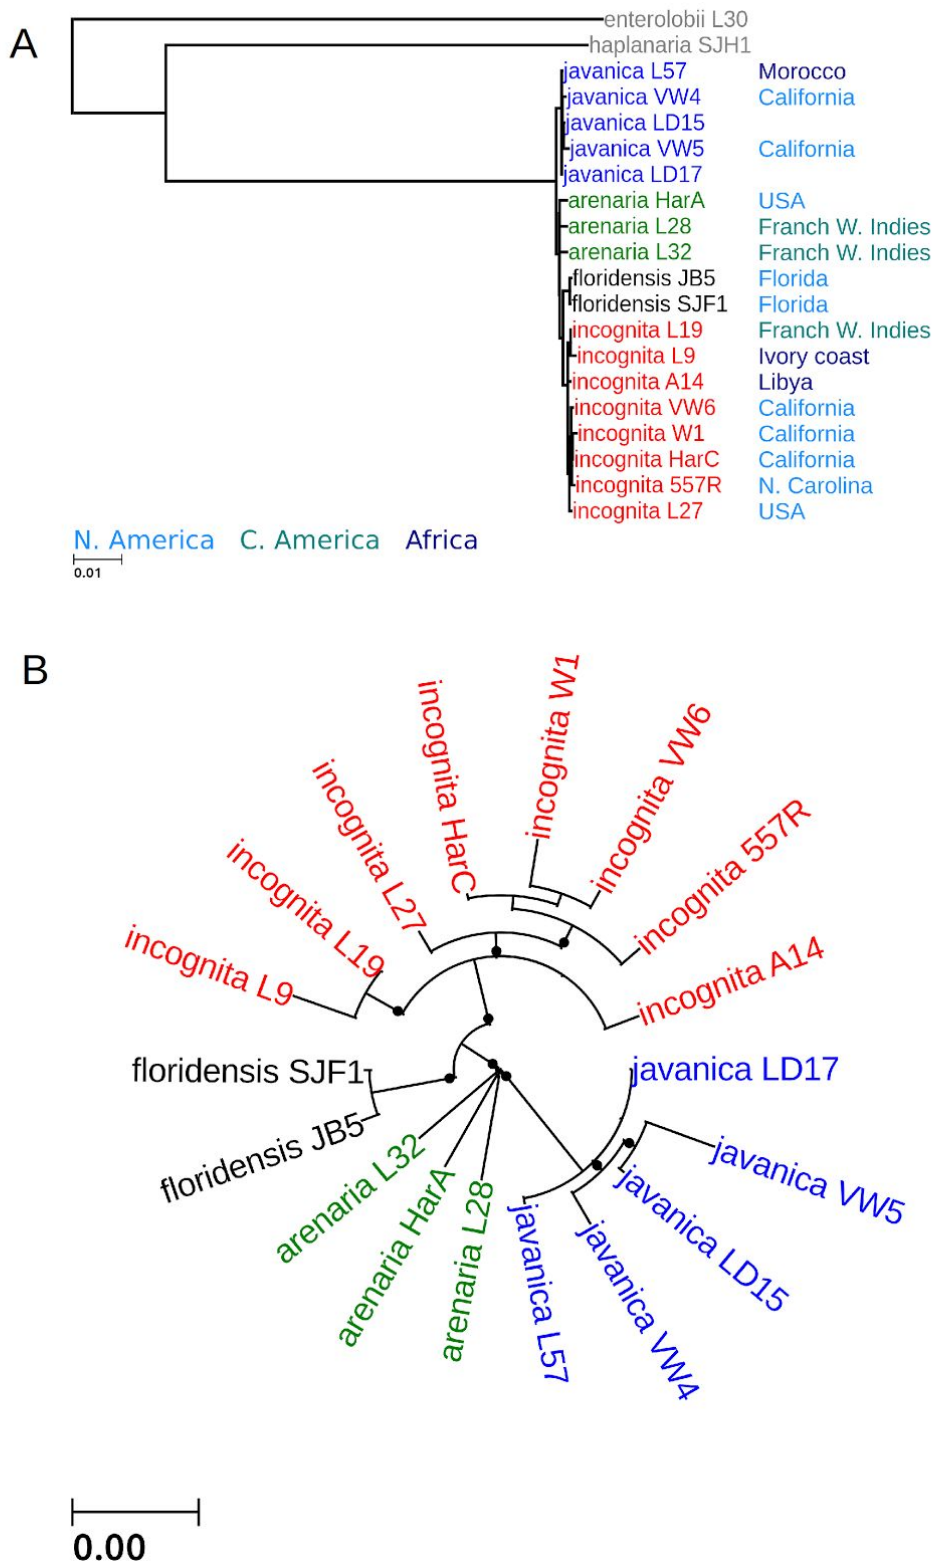

Figure S8: Rooted (A) and unrooted (B) maximum likelihood tree based on a concatenation of mitochondrial genes. Black bullets represent bootstrap percentage > 80 . The tree is in congruence with each of the homoeologue subtrees in the nuclear phylogenetic tree (Figure 3). The geographic origin of samples is indicated in A.

## 7. Phylogenetic analysis of mitochondrial genes

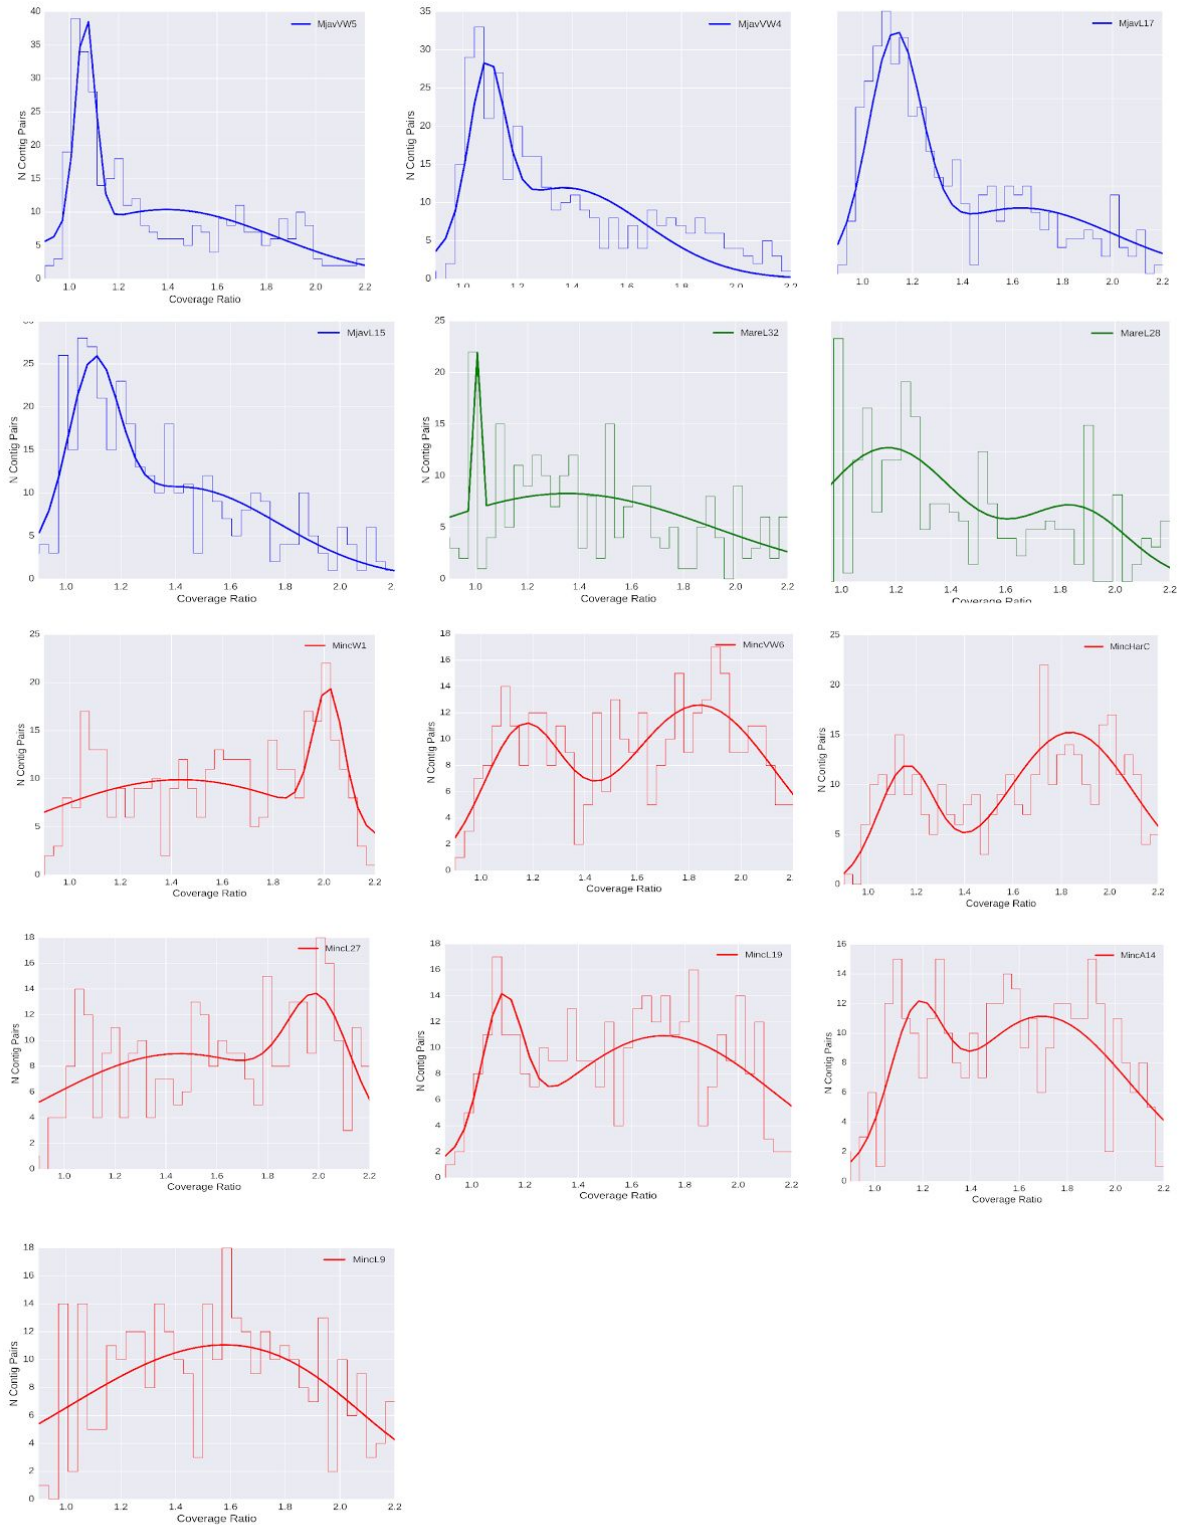

Figure S9: Median coverage ratio distribution per sample

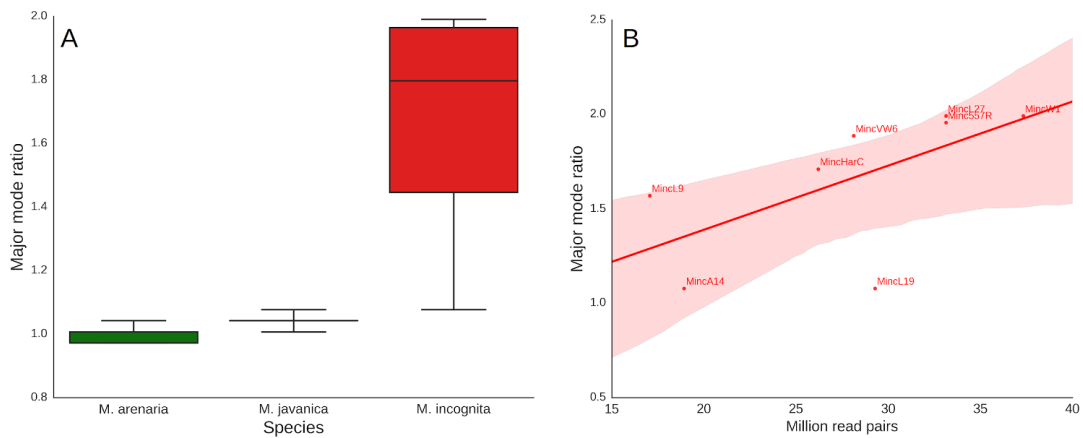

Figure S10: Coverage ratio at the major mode for each MIG apomict species. The major mode in *M. incognita* is around 2 (A), indicating that in this species a large proportion of the genome is triplicated, with two very similar copies and another ~3% divergent, or that there is more gene conversion between A1 and A2 in *M. incognita* than in other species. The large variance around the major mode value in *M. incognita* is an artifact of sequencing depth variation among *M. incognita* isolates, with deeply sequenced isolates demonstrating a clear signal for the large triplicated genome section (B).

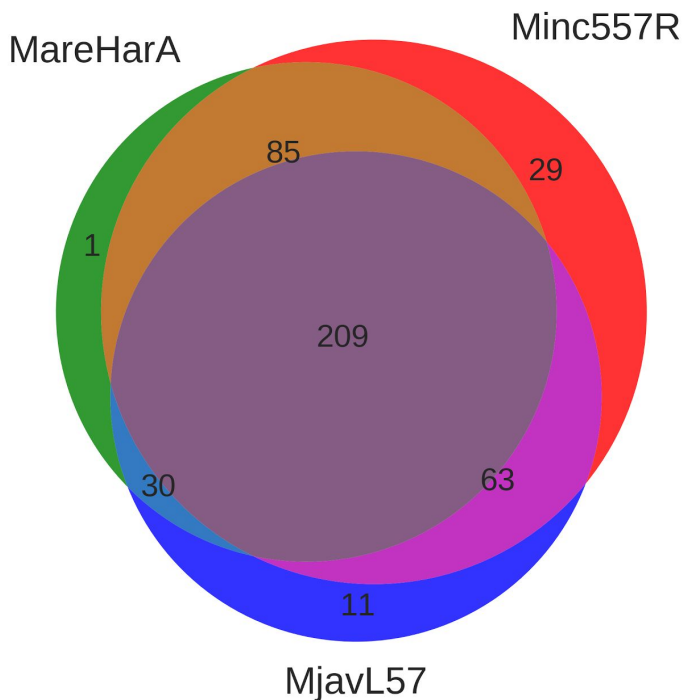

Figure S11: The number of shared contig pairs that represent A1,A2-B genome architecture in the three apomict MIG species.

## 8. Orthology Clusters

### 8.1 Shared orthology clusters

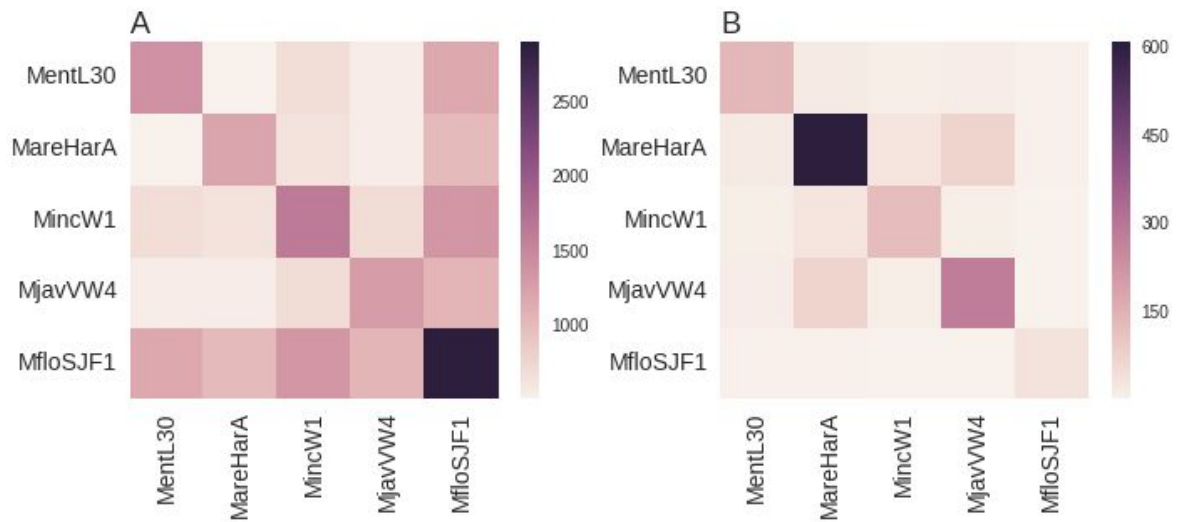

Figure S12: Shared orthology clusters with one (A) and three (B) copies between species



## References

- Abad, Pierre, Jérôme Gouzy, Jean-Marc Aury, Philippe Castagnone-Sereno, Etienne G. J. Danchin, Emeline Deleury, Laetitia Perfus-Barbeoch, et al. 2008. "Genome Sequence of the Metazoan Plant-Parasitic Nematode *Meloidogyne Incognita*." *Nature Biotechnology* 26 (8): 909–15.
- Adam, Mohamed A. M., Mark S. Phillips, and Vivian C. Blok. 2005. "Identification of *Meloidogyne* Spp. from North East Libya and Comparison of Their Inter- and Intra-Specific Genetic Variation Using RAPDs." *Nematology: International Journal of Fundamental and Applied Nematological Research* 7 (4). Brill: 599–609.
- Ferris, H., L. Zheng, and M. A. Walker. 2012. "Resistance of Grape Rootstocks to Plant-Parasitic Nematodes." *Journal of Nematology* 44 (4): 377–86.
- Gleason, Cynthia A., Qingli L. Liu, and Valerie M. Williamson. 2008. "Silencing a Candidate Nematode Effector Gene Corresponding to the Tomato Resistance Gene Mi-1 Leads to Acquisition of Virulence." *Molecular Plant-Microbe Interactions: MPMI* 21 (5): 576–85.
- Gross, Stephen M., and Valerie M. Williamson. 2011. "Tm1: A Mutator/foldback Transposable Element Family in Root-Knot Nematodes." *PloS One* 6 (9): e24534.
- Joseph, Soumi, Tesfamariam Mekete, Wiseborn B. Danquah, and Joseph Noling. 2016. "First Report of *Meloidogyne Haplantaria* Infecting Mi-Resistant Tomato Plants in Florida and Its Molecular Diagnosis Based on Mitochondrial Haplotype." *Plant Disease* 100 (7): 1438–45.
- Lunt, David H., Sujai Kumar, Georgios Koutsovoulos, and Mark L. Blaxter. 2014. "The Complex Hybrid Origins of the Root Knot Nematodes Revealed through Comparative Genomics." *PeerJ* 2 (May). PeerJ Inc.: e356.
- Price, Morgan N., Paramvir S. Dehal, and Adam P. Arkin. 2010. "FastTree 2—approximately Maximum-Likelihood Trees for Large Alignments." *PloS One* 5 (3): e9490.
- Wang, Congli, Steven Lower, Varghese P. Thomas, and Valerie M. Williamson. 2010. "Root-Knot Nematodes Exhibit Strain-Specific Clumping Behavior That Is Inherited as a Simple Genetic Trait." *PloS One* 5 (12): e15148.
- Yaghoobi, J., I. Kaloshian, Y. Wen, and V. M. Williamson. 1995. "Mapping a New Nematode Resistance Locus in *Lycopersicon Peruvianum*." *TAG. Theoretical and Applied Genetics. Theoretische Und Angewandte Genetik* 91 (3): 457–64.
